# Supplementary material
Source: PubMed Central journal article supplement (PMC4371920)
Supplement: pnas.201413798SI.pdf [file pnas.201413798SI.pdf]

# Supporting Information

Yamazaki et al. 10.1073/pnas.1413798112

## SI Text

### Derivation of OKR Gain and Related Learning Rules

First, we simplified equations as follows:

$$\begin{aligned} PC(t) &= w(t)GR(t) - MLI(t) + PC_0 \\ &= w(t)MF(t) - w_{MLI}MF(t) + PC_0 \\ &= MF(t)(w(t) - w_{MLI}) + PC_0, \end{aligned} \quad [S1]$$

$$\begin{aligned} VN(t) &= v(t)MF(t) - w(t)MF(t) + w_{MLI}MF(t) - PC_0 + VN_0 \\ &= MF(t)(v(t) - w(t) + w_{MLI}) - PC_0 + VN_0, \end{aligned} \quad [S2]$$

$$\tau_w \frac{dw}{dt} = -w(t) + \langle MF(t) \rangle - \langle MF(t)CF(t) \rangle, \quad [S3]$$

$$\begin{aligned} \tau_v \frac{dv}{dt} &= -\langle MF(t) \rangle v(t) + \langle MF(t)(VN(t) - \theta(t)) \rangle \\ &= -\langle MF(t) \rangle v(t) + \langle MF(t)(MF(t)(v(t) - w(t) + w_{MLI}) \\ &\quad - PC_0 + VN_0 - \theta(t)) \rangle. \end{aligned} \quad [S4]$$

We decomposed  $MF(t) = \overline{MF} + \delta MF(t)$ , where  $\overline{MF}$  and  $\delta MF(t)$  are the mean and the fluctuation around the mean, respectively. We also decomposed  $CF(t)$  in a similar way. We attempted to take a temporal average over a long enough time span to yield  $\langle \delta MF(t) \rangle = \langle \delta CF(t) \rangle = 0$  during and after training but short enough to yield  $\langle w(t) \rangle = w(t)$  and  $\langle v(t) \rangle = v(t)$ , because  $w(t)$  and  $v(t)$  change slowly over time. Thus, we obtained the following:

$$\begin{aligned} \tau_w \frac{dw}{dt} &= -w(t) + \langle \overline{MF} + \delta MF(t) \rangle - \langle (\overline{MF} + \delta \overline{MF}(t))(\overline{CF} + \delta \overline{CF}(t)) \rangle \\ &= -w(t) + \overline{MF} + \langle \delta MF(t) \rangle - \overline{MF} \overline{CF} - \langle \delta MF(t) \delta CF(t) \rangle \\ &\quad - \overline{MF} \langle \delta CF(t) \rangle - \overline{CF} \langle \delta MF(t) \rangle \\ &= -w(t) + \overline{MF} - \overline{MF} \overline{CF} - \langle \delta MF(t) \delta CF(t) \rangle \\ &= -w(t) + w_0 - \langle \delta MF(t) \delta CF(t) \rangle, \end{aligned} \quad [S5]$$

where the term  $(\overline{MF} - \overline{MF} \overline{CF})$  is denoted by  $w_0$ . Here, the terms  $\overline{MF}$  and  $-\overline{MF} \overline{CF}$  represent PF-LTP and PF-LTD, respectively, induced by spontaneous activity of PFs and CF. Therefore, we call them spontaneous PF-LTP and PF-LTD, respectively. We regard  $w_0$  as the baseline weight of  $w$ , at which spontaneous PF-LTP and PF-LTD are balanced. During OKR adaptation training,  $\delta MF(t)$  and  $\delta CF(t)$  are correlated in time (1), so the value of  $w(t)$  decreases by PF-LTD, which we call specifically training-induced PF-LTD. At resting states,  $\delta MF(t)$  and  $\delta CF(t)$  are independent, so  $w(t)$  returns to the baseline level  $w_0$ . Electrophysiological studies have demonstrated that induction of PF-LTD or PF-LTP occurs quickly within 5 min and reaches its plateau within 30 min, and the recovery from the induction takes more than 24 h (2, 3). To simulate the asymmetry of the time necessary for induction and recovery, we used two equations for  $w(t)$ , one for during training and the other for after training, with different time constants:

$$\frac{dw}{dt} = \begin{cases} \frac{1}{\tau_{\text{learn}}} (-w(t) + w_0 - c_{\text{OKR}}) & \text{(During training)} \\ \frac{1}{\tau_{\text{reconv}}} (-w(t) + w_0), & \text{(After training)} \end{cases}, \quad [S6]$$

where  $\tau_{\text{learn}} \ll \tau_{\text{reconv}}$ , and  $c_{\text{OKR}} = \langle \delta MF(t) \delta CF(t) \rangle$ . Similarly, we obtained the following:

$$\begin{aligned} \tau_v \frac{dv}{dt} &= -\langle \overline{MF} + \delta MF(t) \rangle v(t) \\ &\quad + \langle (\overline{MF} + \delta MF(t)) (\overline{MF} + \delta MF(t)) (v(t) - w(t) + w_{MLI}) \\ &\quad - PC_0 + VN_0 - \theta(t) \rangle. \end{aligned} \quad [S7]$$

Because  $\theta(t)$  is a running average of  $VN(t)$ , we obtained the following:

$$\theta(t) \approx \overline{MF}(v(t) - w(t) + w_{MLI}) - PC_0 + VN_0, \quad [S8]$$

and thereby

$$\begin{aligned} \tau_v \frac{dv}{dt} &= -\langle \overline{MF} + \delta MF(t) \rangle v(t) \\ &\quad + \langle (\overline{MF} + \delta MF(t)) (\delta MF(t) (v(t) - w(t) + w_{MLI})) \rangle \\ &= -\overline{MF} v(t) + \langle \delta MF(t) \delta MF(t) \rangle (v(t) - w(t) + w_{MLI}) \\ &= -(\overline{MF} - \langle \delta MF(t) \delta MF(t) \rangle) v(t) \\ &\quad + \langle \delta MF(t) \delta MF(t) \rangle (-w(t) + w_{MLI}). \end{aligned} \quad [S9]$$

Here, we carefully examined the value of  $\langle \delta MF(t) \delta MF(t) \rangle$ . In the following, we assumed that MFs discharge spikes under the Poisson distribution (4), which means that the mean firing rate is given, whereas the detailed spike timing varies. Let  $f_{MF}(t)$  be the instantaneous firing rate of a MF at time  $t$ . Electrophysiological studies have shown that MF activity correlates with the optokinetic stimulus, i.e., screen velocity, and its peak modulation amplitude is as large as its mean amplitude (5). Therefore,  $f_{MF}(t)$  is given by the following:

$$f_{MF}(t) = \begin{cases} \overline{MF} + \overline{MF} \sin\left(\frac{2\pi}{T}t\right) & \text{(During training)} \\ \overline{MF} & \text{(After training)} \end{cases}, \quad [S10]$$

where  $T$  is the period of sinusoidal screen oscillation, for example, 6 s (6–8). Under the assumption of a Poisson distribution, the probability of which MFs make  $n$  spikes in 1 s, denoted by  $P(n)$ , is given by the following:

$$P(n) = \frac{f_{MF}^n(t)}{n!} e^{-f_{MF}(t)}. \quad [S11]$$

We considered the ensemble average of the events, that is, the average firing rate with respect to many epochs of 1 s. Let  $\mu(t)$  be the average, which is calculated by the following:

$$\mu(t) = \sum_{n=0}^{\infty} n P(n) = f_{MF}(t). \quad [S12]$$

We can see that  $\overline{MF}$ , the mean firing rate of MFs with respect to time, can be obtained by taking the temporal average of  $\mu(t)$ :

$$\langle \mu(t) \rangle = \langle f_{MF}(t) \rangle = \overline{MF}. \quad [S13]$$

Similarly, we calculate the variance of the events, i.e., the variance of the firing rate with respect to many epochs of 1 s. Let  $\sigma^2(t)$  be the variance. Because the variance equals to the average in the Poisson distribution (9), we obtain the following:

$$\sigma^2(t) = \mu(t). \quad [S14]$$

Now, we regard this as the variance of temporal modulation of MF signals, namely,  $\langle \delta MF(t) \delta MF(t) \rangle$ , because the temporal average over a long time would be interchangeable with the ensemble average of many epochs of 1 s, if we split the long time period for the temporal averaging into these epochs. Thus, by taking a temporal average of them, we can obtain the following:

$$\langle \delta MF(t) \delta MF(t) \rangle = \langle \sigma^2(t) \rangle = \langle \mu(t) \rangle = \overline{MF}. \quad [S15]$$

Therefore,  $v(t)$  is updated by the following:

$$\tau_v \frac{dv}{dt} = \overline{MF}(-w(t) + w_{MLI}). \quad [S16]$$

We also considered the activities of PCs and VN:

$$\begin{aligned} PC(t) &= (\overline{MF} + \delta MF(t))(w(t) - w_{MLI}) + PC_0 \\ &= (\overline{MF}(w(t) - w_{MLI}) + PC_0) + \delta MF(t)(w(t) - w_{MLI}), \end{aligned} \quad [S17]$$

$$\begin{aligned} VN(t) &= (\overline{MF} + \delta MF(t))v(t) - PC(t) + VN_0 \\ &= \overline{MF}v(t) + VN_0 + \delta MF(t)v(t) - (\overline{MF}(w(t) - w_{MLI}) + PC_0) \\ &\quad - \delta MF(t)(w(t) - w_{MLI}) \\ &= (\overline{MF}(v(t) - w(t) + w_{MLI}) - PC_0 + VN_0) \\ &\quad + \delta MF(t)(v(t) - w(t) + w_{MLI}). \end{aligned} \quad [S18]$$

Moreover, we defined eye movement in proportion to the modulatory activity of the VN in response to the sinusoidally oscillating screen. We thereby omitted all of the constant terms from  $VN(t)$  to obtain the following:

$$EYE(t) = g_{EYE} \delta MF(t)(v(t) - w(t) + w_{MLI}), \quad [S19]$$

where  $g_{EYE}$  is a constant to translate the neuronal activity to eye movement. Then, OKR gain was defined as the maximum amplitude of the eye movement with respect to the screen oscillation. We denote OKR gain as follows:

$$\begin{aligned} OKR(t) &= g_{EYE} 2|\delta MF(t)|(v(t) - w(t) + w_{MLI}) \\ &= g_{OKR}(v(t) - w(t) + w_{MLI}), \end{aligned} \quad [S20]$$

where  $|\delta MF(t)|$  is the max of  $\delta MF(t)$ , and  $g_{OKR} = g_{EYE} 2|\delta MF(t)|$ . We normalized the screen oscillation amplitude to 1 without loss of generality.

Finally, we arbitrarily set  $\overline{MF} = PC_0 = VN_0 = w_0 = w_{MLI} = 1$  for simplicity. Summarizing, we obtained the following set of equations as a model of long-term OKR adaptation:

OKR gain:

$$OKR(t) = g_{OKR}(v(t) - w(t) + w_{MLI}). \quad [S21]$$

Updating rule of the synaptic weights:

$$\frac{dw}{dt} = \begin{cases} \frac{1}{\tau_{learn}}(-w(t) + w_0 - c_{OKR}) & \text{(During training)} \\ \frac{1}{\tau_{recov}}(-w(t) + w_0) & \text{(After training)} \end{cases}, \quad [S22]$$

$$\frac{dv}{dt} = \frac{1}{\tau_v}(-w(t) + w_{MLI}). \quad [S23]$$

Parameters are  $w(0) = v(0) = 1$ ,  $c_{OKR} = 0.3$ ,  $\tau_{learn} = 20$  min,  $\tau_{recov} = 2.5$  h,  $\tau_v = 5.5$  h, and  $g_{OKR} = 0.3$ . These values were chosen to fit simulation results with experimental data (6).

### Simulation of Cortical Shutdown and Muscimol Infusion

The cortical shutdown by injection of lidocaine (6) was simulated by setting the activity of PCs at 0 immediately after training. A calculation yields the following set of equations:

OKR gain:

$$OKR(t) = \begin{cases} g_{OKR}(v(t) - w(t) + w_{MLI}) & \text{(During training)} \\ g_{OKR}(v(t)) & \text{(After training)} \end{cases}. \quad [S24]$$

Updating rule of the synaptic weights:

$$\frac{dw}{dt} = \begin{cases} \frac{1}{\tau_{learn}}(-w(t) + w_0 - c_{OKR}) & \text{(During training)} \\ \frac{1}{\tau_{recov}}(-w(t) + w_0) & \text{(After training)} \end{cases}, \quad [S25]$$

$$\frac{dv}{dt} = \begin{cases} \frac{1}{\tau_v}(-w(t) + w_{MLI}) & \text{(During training)} \\ 0 & \text{(After training)} \end{cases}. \quad [S26]$$

Infusion of muscimol into the cerebellar cortex (7) was also simulated by the same equations after training with a certain delay but not immediately after training.

### Simulation of Gene-Manipulated Animals

We also considered the case of deficits of either PF-LTP or PF-LTD at PF-PC synapses (10, 11). We introduced nonlinearity explicitly to maintain positive synaptic weights and neural activity, namely  $w(t) \geq 0$ ,  $v(t) \geq 0$ ,  $PC(t) \geq 0$ ,  $VN(t) \geq 0$ . In normal circumstances, these conditions hold naturally. In the update rule of the synapses (Eq. S5), the baseline value of PF-PC synaptic weight is determined by the balance of spontaneous PF-LTP and PF-LTD ( $w_0 = \overline{MF} - \overline{MF} \overline{CF}$ ).

First, we considered the case of a deficit in PF-LTP. If PF-LTP is impaired, the synaptic weight decreases toward  $-\overline{MF} \overline{CF}$  but stops at 0. Thus, all synapses vanish, that is,  $w(t) = 0$  for any  $t$ . Under this condition, a calculation yields the following set of equations:

OKR gain:

$$OKR(t) = g_{OKR}(v(t)). \quad [S27]$$

Synaptic weights:

$$w(t) = 0 \quad \text{for any } t. \quad [S28]$$

$$v(t) = v(0) \quad \text{for any } t. \quad [S29]$$

Apparently, OKR gain is a constant  $g_{OKR}v(0)$ .

Second, we considered the PF-LTD-deficient case. There are two PF-LTD terms in Eq. S5: one is spontaneous PF-LTD ( $-\overline{MF}CF$ ) and the other is training-induced PF-LTD ( $-c_{OKR} = -\langle \delta MF(t)\delta CF(t) \rangle$ ). The conventional PF-LTD induction protocol, which uses paired stimulation of PFs at 1 Hz and CF at 1 Hz in slice experiments, corresponds to the spontaneous PF-LTD. Impairment of PF-LTD was confirmed by this protocol (11). Training-induced PF-LTD has never been tested to date. We assume that PF-LTD-deficient mice (11) lack only spontaneous PF-LTD. Thus, we removed the term from Eq. S5 and defined  $w_0 = \overline{MF}$ . Under this condition, PF-PC synaptic weight is so large that  $VN(t) = 0$ . It follows  $v(t) = 0$  at the resting state from Eq. S9. Moreover, from Eq. S9, plasticity at MF-VN synapses works only when  $v(t) - w(t) + w_{MLI} \geq 0$ . After a calculation, we obtain the following set of equations:  
OKR gain:

$$OKR(t) = \begin{cases} g_{OKR}(v(t) - w(t) + w_{MLI}) & \text{when } v(t) - w(t) + w_{MLI} \geq 0, \\ 0 & \text{otherwise.} \end{cases} \quad [S30]$$

Updating rule of the synaptic weights:

$$\frac{dw}{dt} = \begin{cases} \frac{1}{\tau_{\text{learn}}}(-w(t) + w_0 - c_{OKR}) & \text{(During training)} \\ \frac{1}{\tau_{\text{recov}}}(-w(t) + w_0) & \text{(After training)} \end{cases}, \quad [S31]$$

$$\frac{dv}{dt} = \begin{cases} \frac{1}{\tau_v}(-w(t) + w_{MLI}) & \text{when } v(t) - w(t) + w_{MLI} \geq 0, \\ 0 & \text{otherwise.} \end{cases} \quad [S32]$$

To demonstrate that normal motor learning can occur under PF-LTD knockout in a certain condition, we changed values of three parameters, which could be mediated by some compensation mechanisms in gene-manipulated animals. We set  $g_{OKR} = 1.0$ , which was set at 0.3 in normal condition, and  $v(0) = 0$  and  $w(0) =$

$w_0 = 1.1$ , which were set at 1 in the normal condition. Other parameters were identical to the normal condition. Training was made for 8 d to observe the success or failure of memory transfer clearly.

Furthermore, we consider the case of selective depletion of GABA receptors on PCs (12). We deleted the inhibition term from PCs. This was made equivalently by setting  $w_{MLI} = 0$ . This manipulation strengthens the inhibition from PCs to VN, thereby making the OKR gain totally negative. To compensate for this, we added a constant  $c_{\text{compensate}}$  to  $OKR(t)$ . A calculation yields the following set of equations:  
OKR gain:

$$OKR(t) = g_{OKR}(v(t) - w(t)) + c_{\text{compensate}}. \quad [S33]$$

Updating rule of the synaptic weights:

$$\frac{dw}{dt} = \begin{cases} \frac{1}{\tau_{\text{learn}}}(-w(t) + w_0 - c_{OKR}) & \text{(During training)} \\ \frac{1}{\tau_{\text{recov}}}(-w(t) + w_0) & \text{(After training)} \end{cases}, \quad [S34]$$

$$\frac{dv}{dt} = \frac{1}{\tau_v}(-w(t)), \quad [S35]$$

where  $c_{\text{compensate}} = 1.0$ ,  $v(0) = 0.0$ . Other parameters were identical to the normal case.

### Simulated Training Paradigms

A typical simulated training was 1 h of daily training followed by 23 h of rest for 4 or 5 consecutive days. Simulated OKR gain was calculated while  $w(t)$  and  $v(t)$  were updated. Specifically, during the training and afterward,  $w(t)$  was updated by interleaving two equations “during training” and “after training,” respectively. Some simulations used much shorter daily trainings of 15 or 7.5 min. Simulation programs were written in C language. Differential equations were solved numerically by the forward Euler method with a time step of 1 min.

1. Nagao S (1988) Behavior of floccular Purkinje cells correlated with adaptation of horizontal optokinetic eye movement response in pigmented rabbits. *Exp Brain Res* 73(3):489–497.
2. Murashima M, Hirano T (1999) Entire course and distinct phases of day-lasting depression of miniature EPSC amplitudes in cultured Purkinje neurons. *J Neurosci* 19(17):7326–7333.
3. Le TD, et al. (2010) Lipid signaling in cytosolic phospholipase  $A_2\alpha$ -cyclooxygenase-2 cascade mediates cerebellar long-term depression and motor learning. *Proc Natl Acad Sci USA* 107(7):3198–3203.
4. Gerstner W, Kistler W (2002) *Spiking Neuron Models* (Cambridge Univ Press, Cambridge, UK).
5. Maekawa K, Takeda T, Kimura M (1981) Neural activity of nucleus reticularis tegmenti pontis—the origin of visual mossy fiber afferents to the cerebellar flocculus of rabbits. *Brain Res* 210(1-2):17–30.
6. Shutoh F, Ohki M, Kitazawa H, Itoharu S, Nagao S (2006) Memory trace of motor learning shifts transsynaptically from cerebellar cortex to nuclei for consolidation. *Neuroscience* 139(2):767–777.

7. Okamoto T, Endo S, Shirao T, Nagao S (2011) Role of cerebellar cortical protein synthesis in transfer of memory trace of cerebellum-dependent motor learning. *J Neurosci* 31(24):8958–8966.
8. Okamoto T, Shirao T, Shutoh F, Suzuki T, Nagao S (2011) Post-training cerebellar cortical activity plays an important role for consolidation of memory of cerebellum-dependent motor learning. *Neurosci Lett* 504(1):53–56.
9. Hogg RV, Craig AT (1978) *Introduction to Mathematical Statistics* (Macmillan, New York), 4th Ed.
10. Schonewille M, et al. (2010) Purkinje cell-specific knockout of the protein phosphatase PP2B impairs potentiation and cerebellar motor learning. *Neuron* 67(4):618–628.
11. Schonewille M, et al. (2011) Reevaluating the role of LTD in cerebellar motor learning. *Neuron* 70(1):43–50.
12. Wulff P, et al. (2009) Synaptic inhibition of Purkinje cells mediates consolidation of vestibulo-cerebellar motor learning. *Nat Neurosci* 12(8):1042–1049.
